# Supplementary material for: Patient experiences with outpatient care in Hungary: results of an online population survey
Source: Springer Nature journal article supplement (doi:10.1007/s10198-019-01064-z), 2019-05-16
Supplement: MOESM1 [file 16728824]

## **Patient experiences with outpatient care in Hungary: results of an online population survey**

European Journal of Health Economics (Special Issue)

**Authors:** Óscar Brito Fernandes<sup>1,2</sup>, Petra Baji<sup>1</sup>, Dionne Kringos<sup>2</sup>, Niek Klazinga<sup>2</sup>, László Gulácsi<sup>1</sup>, Armin Lucevic<sup>1,2</sup>, Imre Boncz<sup>3</sup>, Márta Péntek<sup>1</sup>

**Title:** Patient experiences with outpatient care in Hungary: results of an online population survey

### **Authors' affiliations**

<sup>1</sup> Department of Health Economics, Corvinus University of Budapest, Fővám tér 8., H-1093 Budapest, Hungary

<sup>2</sup> Department of Public Health, Amsterdam UMC, University of Amsterdam, Amsterdam Public Health research institute, Meibergdreef 9, 1105 AZ Amsterdam, The Netherlands

<sup>3</sup> Institute for Health Insurance, Faculty of Health Sciences, University of Pécs, Mária u. 5-7., H-7621 Pécs, Hungary

### **Corresponding author**

Márta Péntek

Corvinus University of Budapest

Department of Health Economics

H-1093 Budapest, Fővám tér 8.

E-mail: [marta.pentek@uni-corvinus.hu](mailto:marta.pentek@uni-corvinus.hu)

Supplementary material

Fig. S1 Doctor spending enough time with patient in consultation, 2010, 2013 and 2016 (or nearest year)

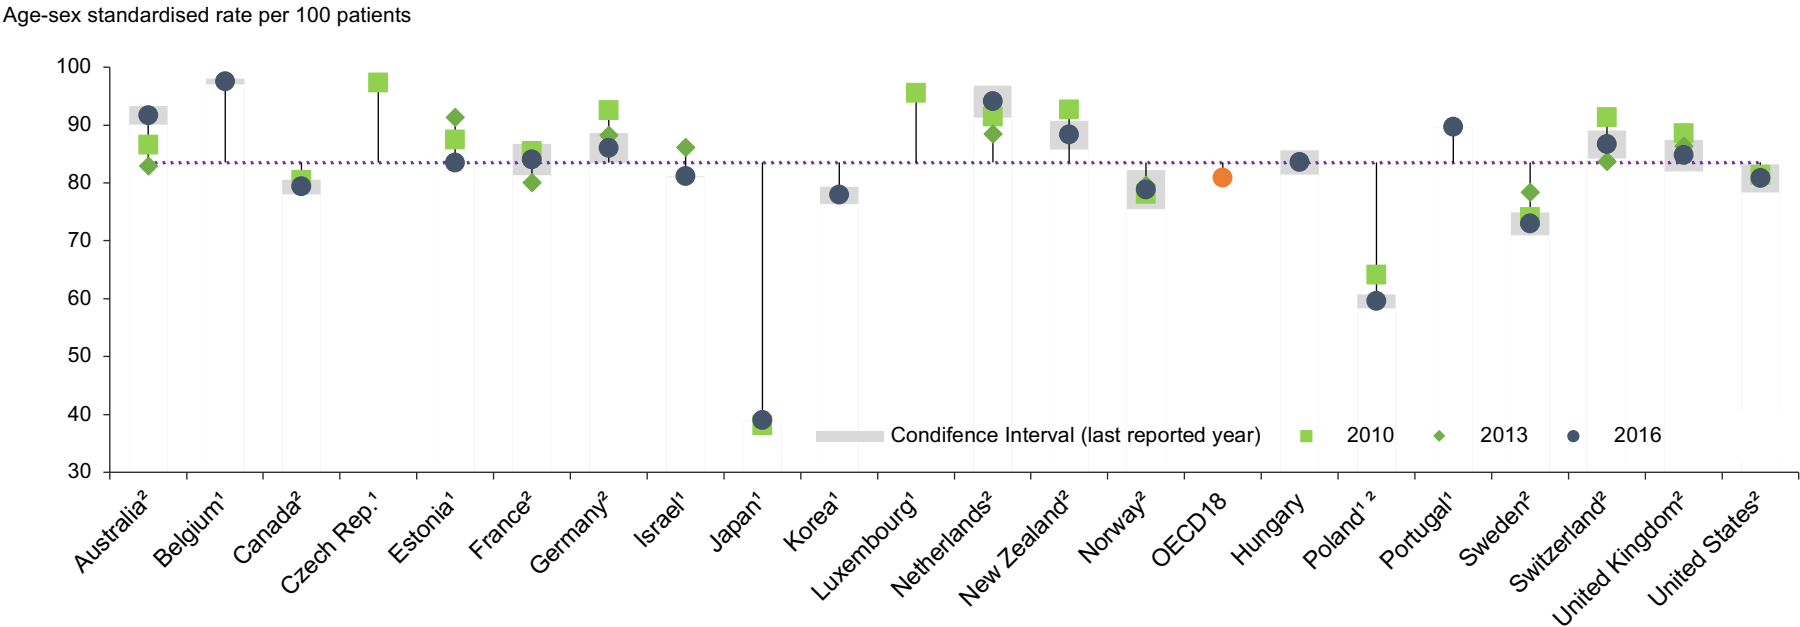

The graphic compiles data retrieved from the OECD.Stat (<https://stats.oecd.org>) using the health care quality indicators database. The sources of that database were the Commonwealth Fund International Health Policy Survey 2016 and other national sources.

The 95% confidence intervals have been calculated for all countries and is represented by grey areas.

Countries with superscript 1: data from national sources and; 2: data refer to patient experiences with regular doctor.

Hungarian data are not standardized against OECD 2010 population but is retrieved from a national representative sample of Hungary, adjusted for gender, age, highest education level attained, type of settlement, and region of residence.

**Supplementary material**

**Fig. S2** Doctor providing easy-to-understand explanations, 2010, 2013 and 2016 (or nearest years)

Age-sex standardised rate per 100 patients

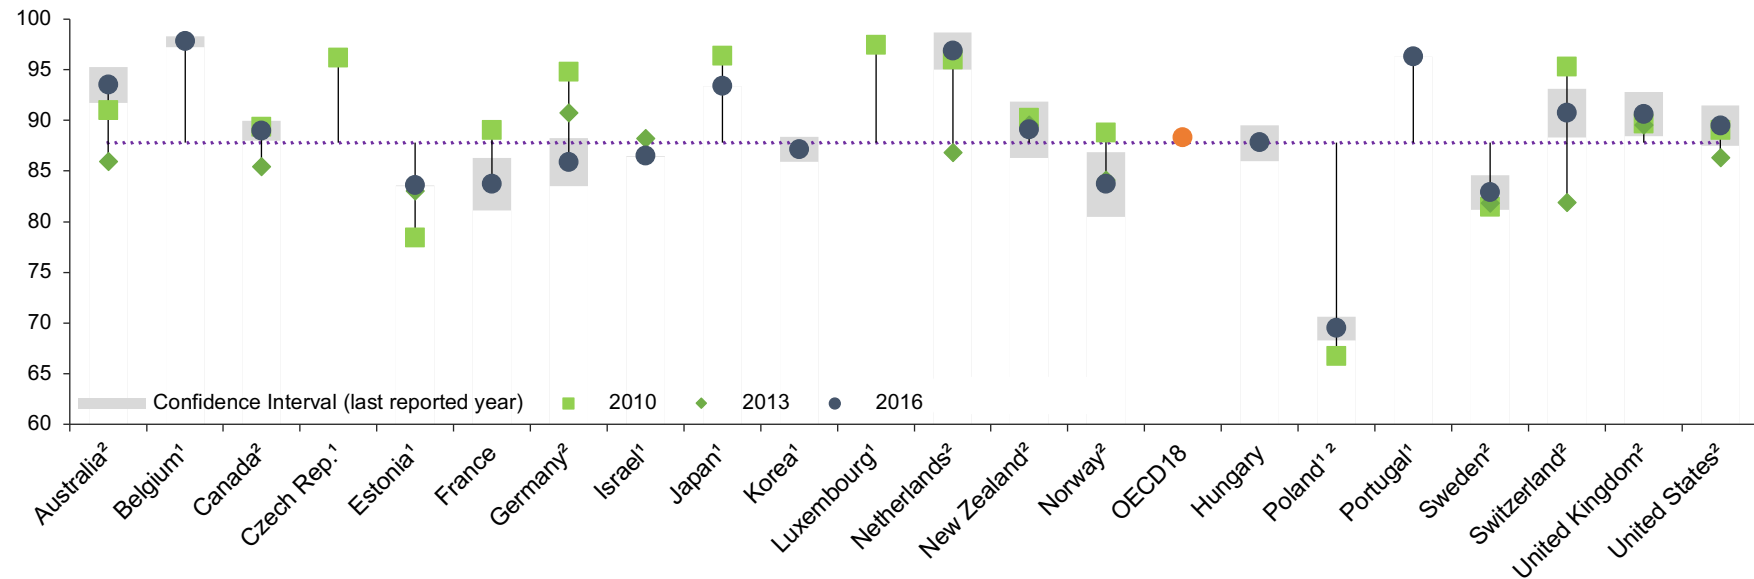

The graphic compiles data retrieved from the OECD.Stat (<https://stats.oecd.org>) using the health care quality indicators database. The sources of that database were the Commonwealth Fund International Health Policy Survey 2016 and other national sources.

The 95% confidence intervals have been calculated for all countries and is represented by grey areas.

Countries with superscript 1: data from national sources and; 2: data refer to patient experiences with regular doctor.

Hungarian data are not standardized against OECD 2010 population but is retrieved from a national representative sample of Hungary, adjusted for gender, age, highest education level attained, type of settlement, and region of residence.

**Supplementary material**

**Fig. S3** Doctor giving opportunity to ask questions or raise concerns, 2010, 2013 and 2016 (or nearest years)

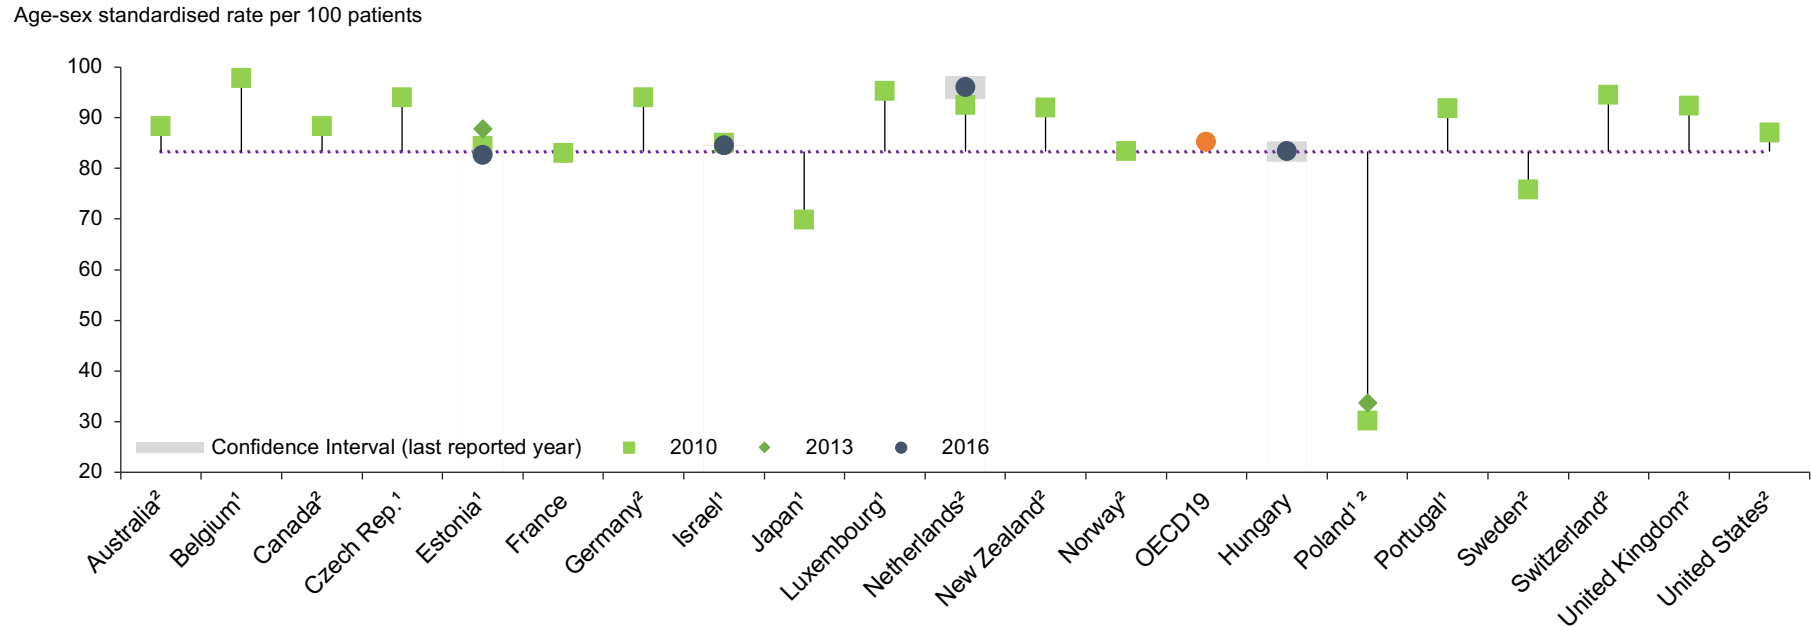

The graphic compiles data retrieved from the OECD.Stat (<https://stats.oecd.org>) using the health care quality indicators database. The sources of that database were the Commonwealth Fund International Health Policy Survey 2016 and other national sources.

The 95% confidence intervals have been calculated for all countries and is represented by grey areas.

Countries with superscript 1: data from national sources and; 2: data refer to patient experiences with regular doctor.

Hungarian data are not standardized against OECD 2010 population but is retrieved from a national representative sample of Hungary, adjusted for gender, age, highest education level attained, type of settlement, and region of residence.

**Supplementary material**

**Fig. S4** Doctor involving patient in decisions about care and treatment, 2010, 2013 and 2016 (or nearest years)

Age-sex standardised rate per 100 patients

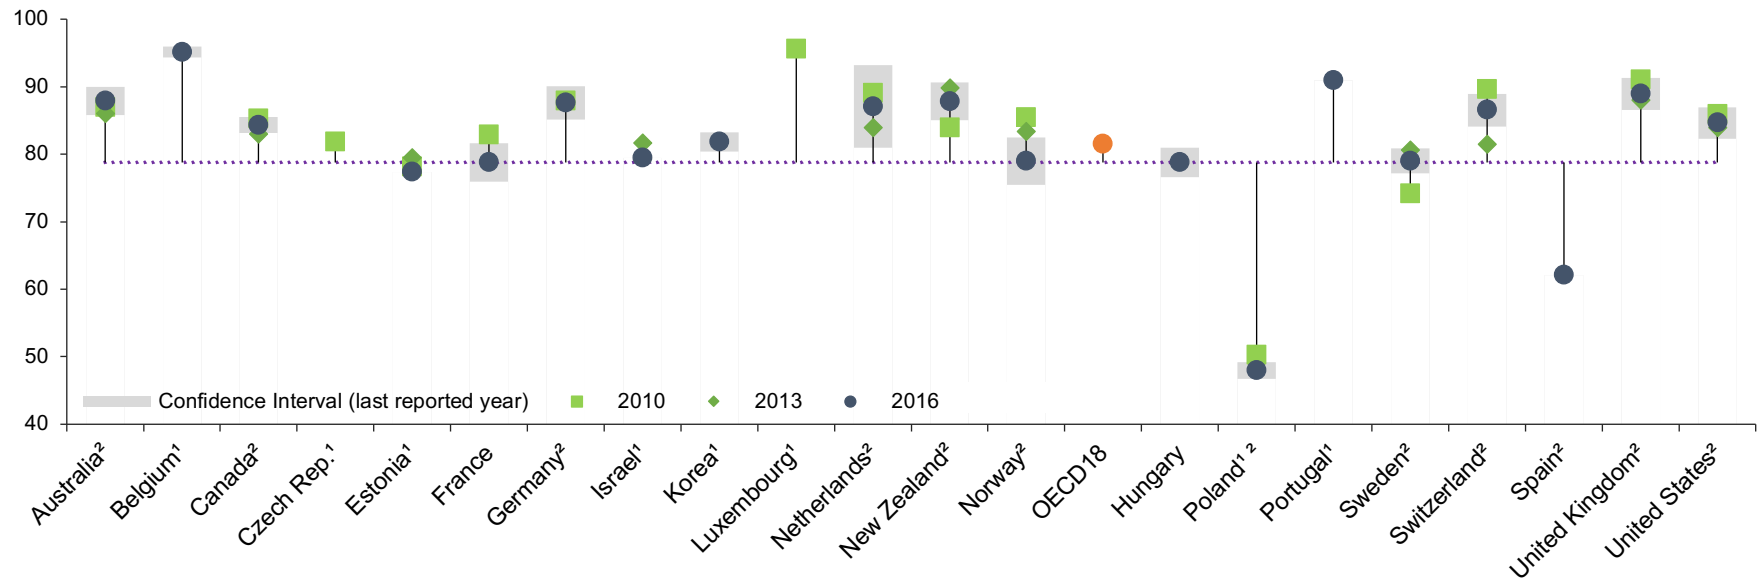

The graphic compiles data retrieved from the OECD.Stat (<https://stats.oecd.org>) using the health care quality indicators database. The sources of that database were the Commonwealth Fund International Health Policy Survey 2016 and other national sources.

The 95% confidence intervals have been calculated for all countries and is represented by grey areas.

Countries with superscript 1: data from national sources and; 2: data refer to patient experiences with regular doctor.

Hungarian data are not standardized against OECD 2010 population but is retrieved from a national representative sample of Hungary, adjusted for gender, age, highest education level attained, type of settlement, and region of residence.
